# Supplementary material
Source: publisher figshare collection journal article supplement (https://sage.figshare.com/ndownloader/files/14813009)
Supplement: Supplementary file 1 [file 14813009]

Appendix A

***SimPCNL Global Rating Scale***

Please circle the score corresponding to candidate's performance in each category.

|                                 | 1                                                                    | 2 | 3                                                                               | 4 | 5                                                                                    |
|---------------------------------|----------------------------------------------------------------------|---|---------------------------------------------------------------------------------|---|--------------------------------------------------------------------------------------|
| <b>Identify Anatomy</b>         | No Knowledge                                                         |   | Identified Most Landmarks                                                       |   | Identified All Landmarks                                                             |
| <b>Plan Needle Puncture</b>     | 1<br>Target incorrect calyx or wrong angle<br>Multiple needle passes | 2 | 3<br>Eventually targets correct calyx at appropriate angle. A few needle passes | 4 | 5<br>Correct calyx targeted<br>Needle at appropriate angle.<br>Minimum needle passes |
| <b>Use of Instruments</b>       | 1<br>Difficulty using and coordinating access needle and guidewire   | 2 | 3<br>Able to use access needle and guidewire although awkward at times          | 4 | 5<br>Able to use access needle and guidewire smoothly                                |
| <b>Ability to Perform Tasks</b> | 1<br>Frequently stopped or needed advice/assistance from examiner    | 2 | 3<br>Performed procedure with little advice/assistance from examiner            | 4 | 5<br>Performed procedure with no advice/assistance from examiner                     |
| <b>Overall Performance</b>      | 1<br>Poor                                                            | 2 | 3<br>Average                                                                    | 4 | 5<br>Excellent                                                                       |
